# Supplementary material for: Single-Dose SARS-CoV-2 Vaccination With BNT162b2 and AZD1222 Induce Disparate Th1 Responses and IgA Production
Source: bioRxiv or medRxiv preprint supplement (doi:10.1101/2021.09.17.21263726), 2021-09-21
Supplement: Supplementary file [file media-1.pdf]

# Single-Dose SARS-CoV-2 Vaccination With BNT162b2 and AZD1222 Induce Disparate Th1 Responses and IgA Production

## Supplementary Information

Michael Müller, Johann Volzke, Behnam Subin, Silke Müller, Martina Sombetzki, Emil C.  
Reisinger, Brigitte Müller-Hilke

### **Contents**

Supplementary Figures 1-7

Supplementary Tables 1-3

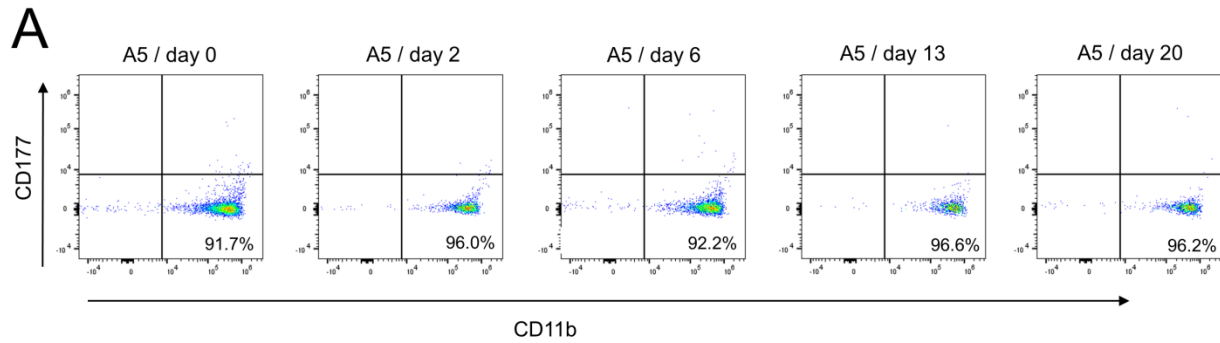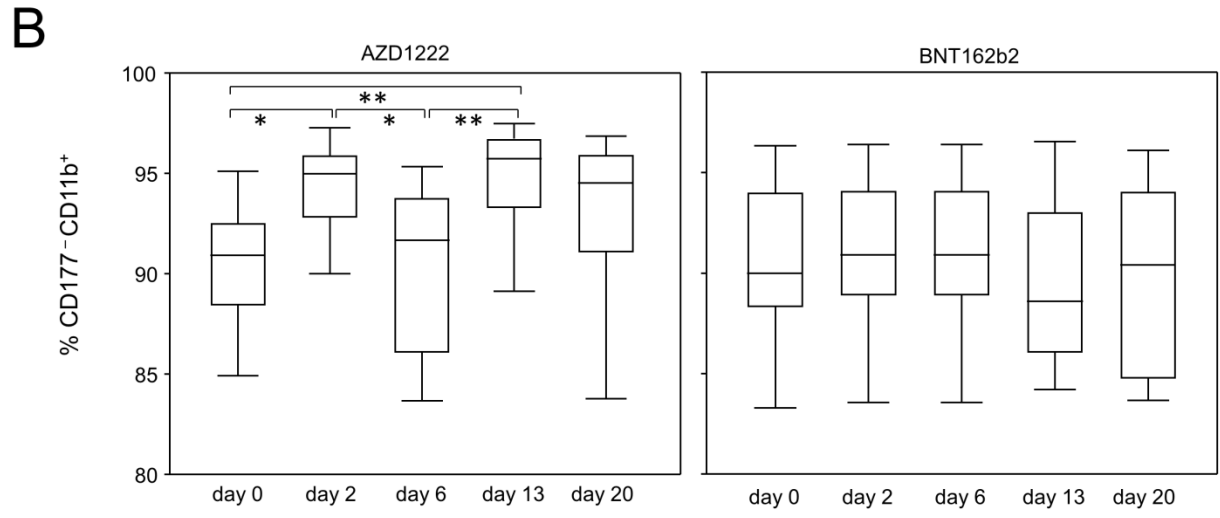

**Supplementary Fig. 1 Vaccination with AZD1222, unlike BNT162b2, led to an intermittent increase in CD14<sup>+</sup>CD16<sup>-</sup>CD11b<sup>+</sup>CD177<sup>-</sup> granulocytes. A** Pseudocolor plots for the expression of CD11b and CD177 on SSC<sup>hi</sup>CD14<sup>+</sup>CD16<sup>-</sup> granulocytes are representative for the AZD1222 vaccination group. **B** Proportions of CD177<sup>-</sup>CD11b<sup>+</sup> granulocytes after vaccination with AZD1222 (n = 18, left panel) or BNT162b2 (n = 18, right panel). p-values resulting from Kruskal-Wallis and Dunn's multiple comparisons tests were 0.0004 for AZD1222 and 0.6760 for BNT162b2 analyses, respectively. \*p < 0.05, \*\*p < 0.01

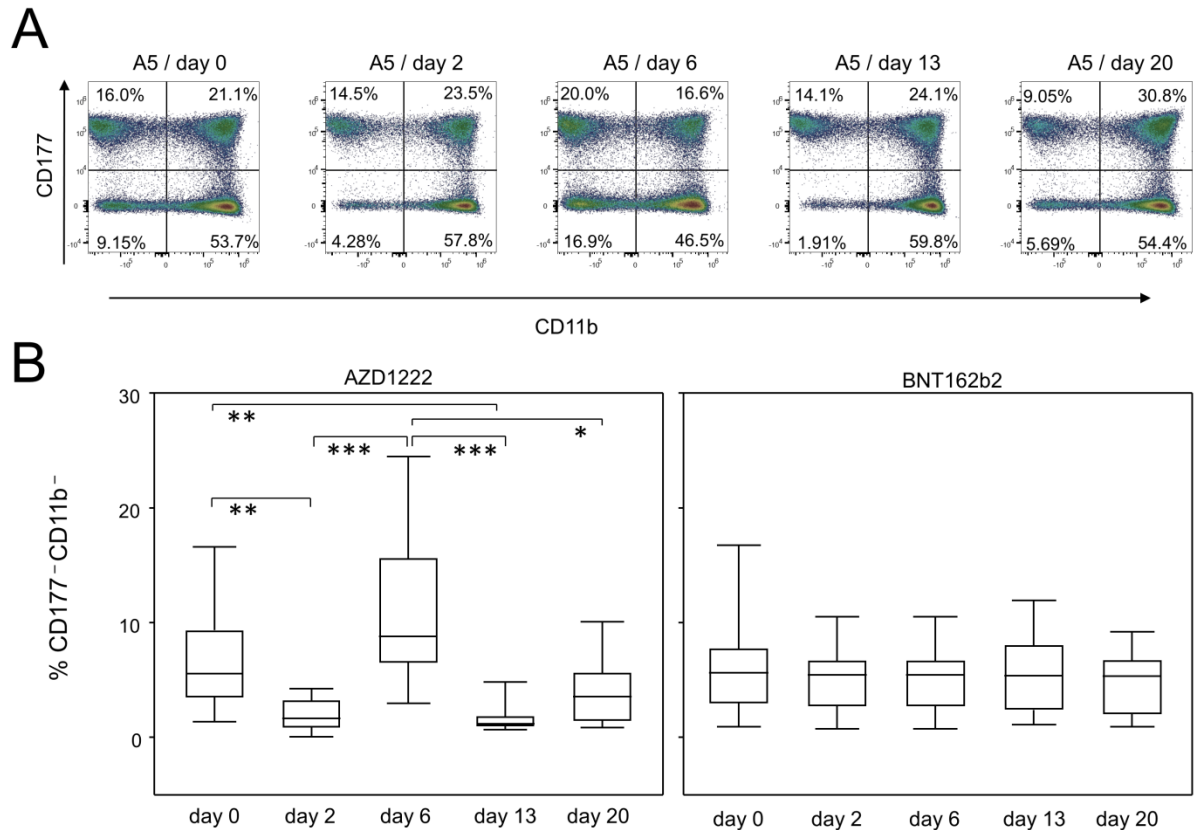

**Supplementary Fig. 2 CD14<sup>+</sup>CD16<sup>+</sup>CD11b<sup>-</sup>CD177<sup>-</sup> granulocytes were decreased after vaccination with AZD1222 only. A** Pseudocolor plots for the expression of CD11b and CD177 on SSC<sup>hi</sup>CD14<sup>+</sup>CD16<sup>+</sup> granulocytes are representative for the AZD1222 vaccination group. **B** Proportions of CD177<sup>-</sup>CD11b<sup>-</sup> granulocytes after vaccination with AZD1222 (n = 18, left panel) or BNT162b2 (n = 18, right panel). FACS analyses were gated on CD14<sup>+</sup>CD16<sup>+</sup> granulocytes. p-values resulting from Kruskal-Wallis and Dunn's multiple comparisons tests were < 0.0001 for AZD1222 and 0.9152 for BNT162b2 analyses, respectively. \*p < 0.05, \*\*p < 0.01, \*\*\*p < 0.001

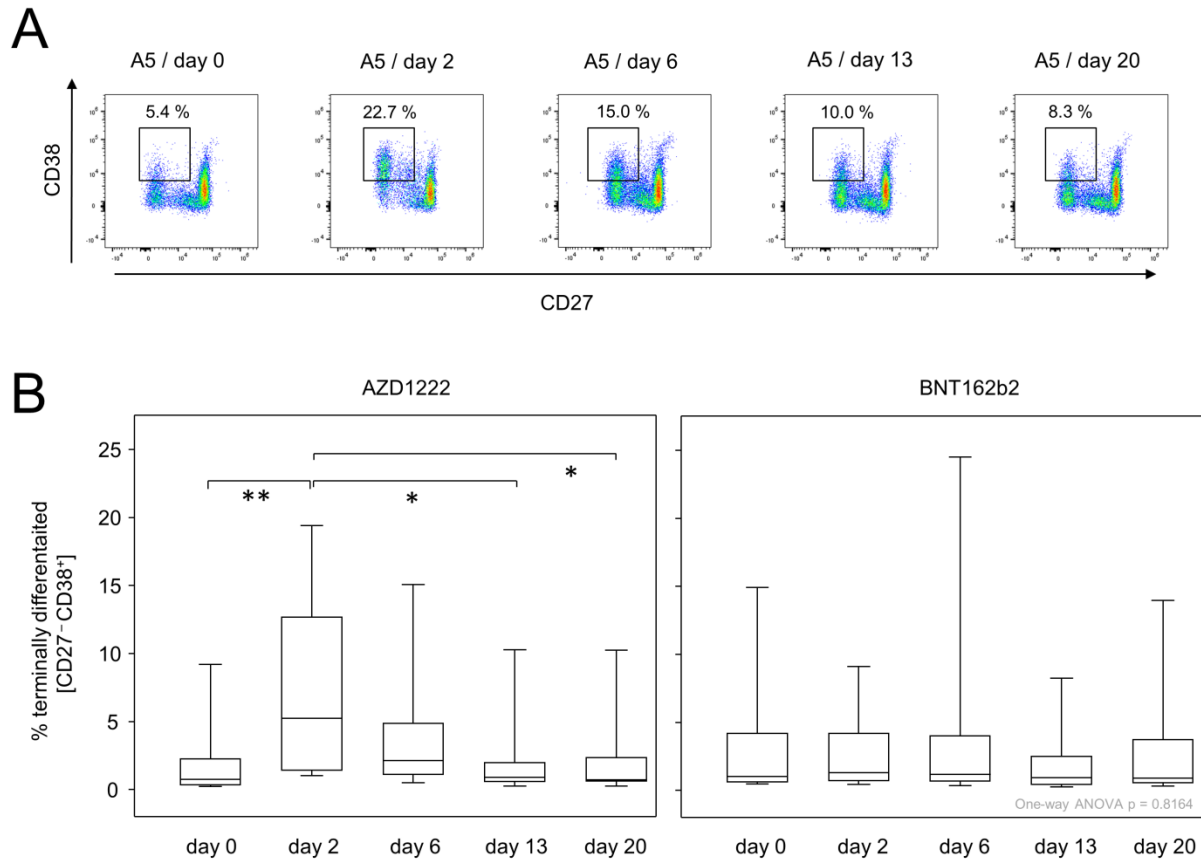

**Supplementary Fig. 3 AZD1222 vaccination induced the transient increase of CD27<sup>-</sup>CD38<sup>+</sup> terminally differentiated CD8<sup>+</sup> T cells.** **A** Pseudocolor plots for the expression of CD27 and CD38 on CD8<sup>+</sup> T cells are representative for the AZD1222 vaccination group. **B** Proportions of CD8<sup>+</sup>CD27<sup>-</sup>CD38<sup>+</sup> T cells after vaccination with AZD1222 (n = 18, left panel) or BNT162b2 (n = 18, right panel). All FACS analyses were on CD8<sup>+</sup> T cells. p-values resulting from Kruskal-Wallis and Dunn's multiple comparisons tests were 0.0009 for AZD1222 and 0.7905 for BNT162b2 analyses, respectively. \*p < 0.05, \*\*p < 0.01

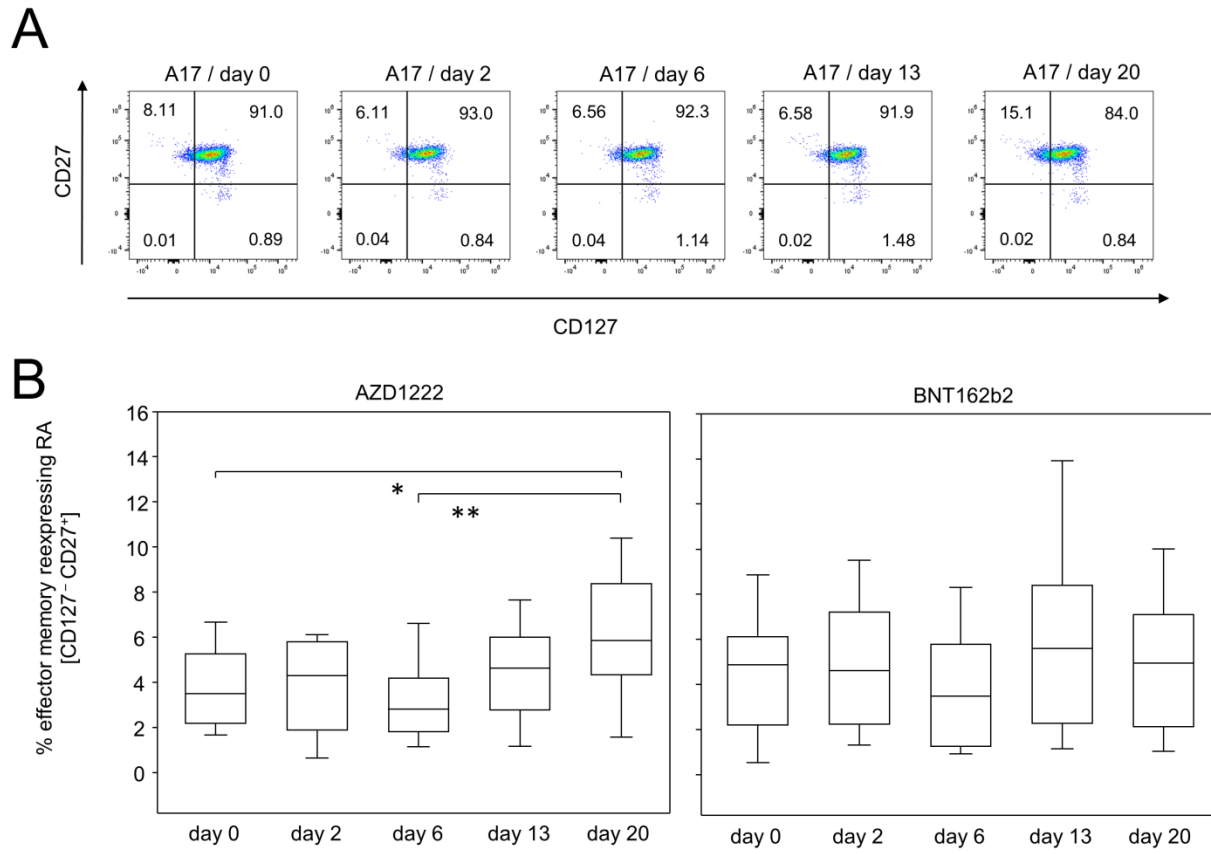

**Supplementary Fig. 4 CD4<sup>+</sup> effector memory T cells re-expressing RA were increased towards the end of the observation period after AZD1222 vaccination. A** Pseudocolor plots for the expression of CD127 and CD27 on CD4<sup>+</sup> T cells are representative for the AZD1222 vaccination group. **B** Proportions of CD4<sup>+</sup>CD127<sup>+</sup>CD27<sup>+</sup> T cells after vaccination with AZD1222 (n = 18, left panel) or BNT162b2 (n = 18, right panel). All FACS analyses were on CD4<sup>+</sup> T cells. p-values resulting from one-way ANOVA and Tukey-Kramer multiple comparisons tests were 0.0063 for AZD1222 and 0.4955 for BNT162b2 analyses, respectively. \*p < 0.05, \*\*p < 0.01

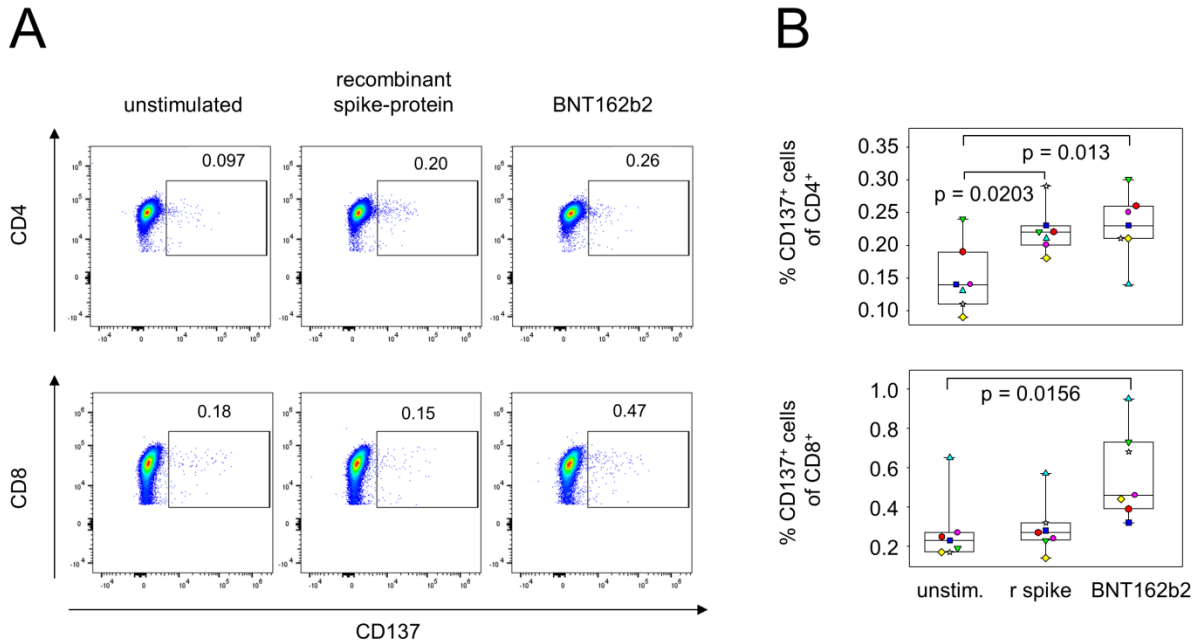

**Supplementary Fig. 5 Establishment of a protocol for the re-stimulation of SARS-CoV-2 spike protein specific immune cells.** PBMCs were isolated from fully vaccinated ( $n = 6$ ) and COVID-19 convalescent ( $n = 1$ ) blood donors and were in vitro re-stimulated with either recombinant spike protein (r spike) or the spike protein encoding mRNA (BNT162b2). **A** Representative pseudocolor plots showing the expression of CD137 on CD4<sup>+</sup> (upper panel) or CD8<sup>+</sup> T cells (lower panel) exemplifies activation. **B** Quantitative data for different stimulation regimen show that recombinant spike protein induced the enrichment of activated CD4<sup>+</sup> T cells, whereas spike protein encoding mRNA was able to increase the proportions of both activated CD4<sup>+</sup> and CD8<sup>+</sup> T cells.

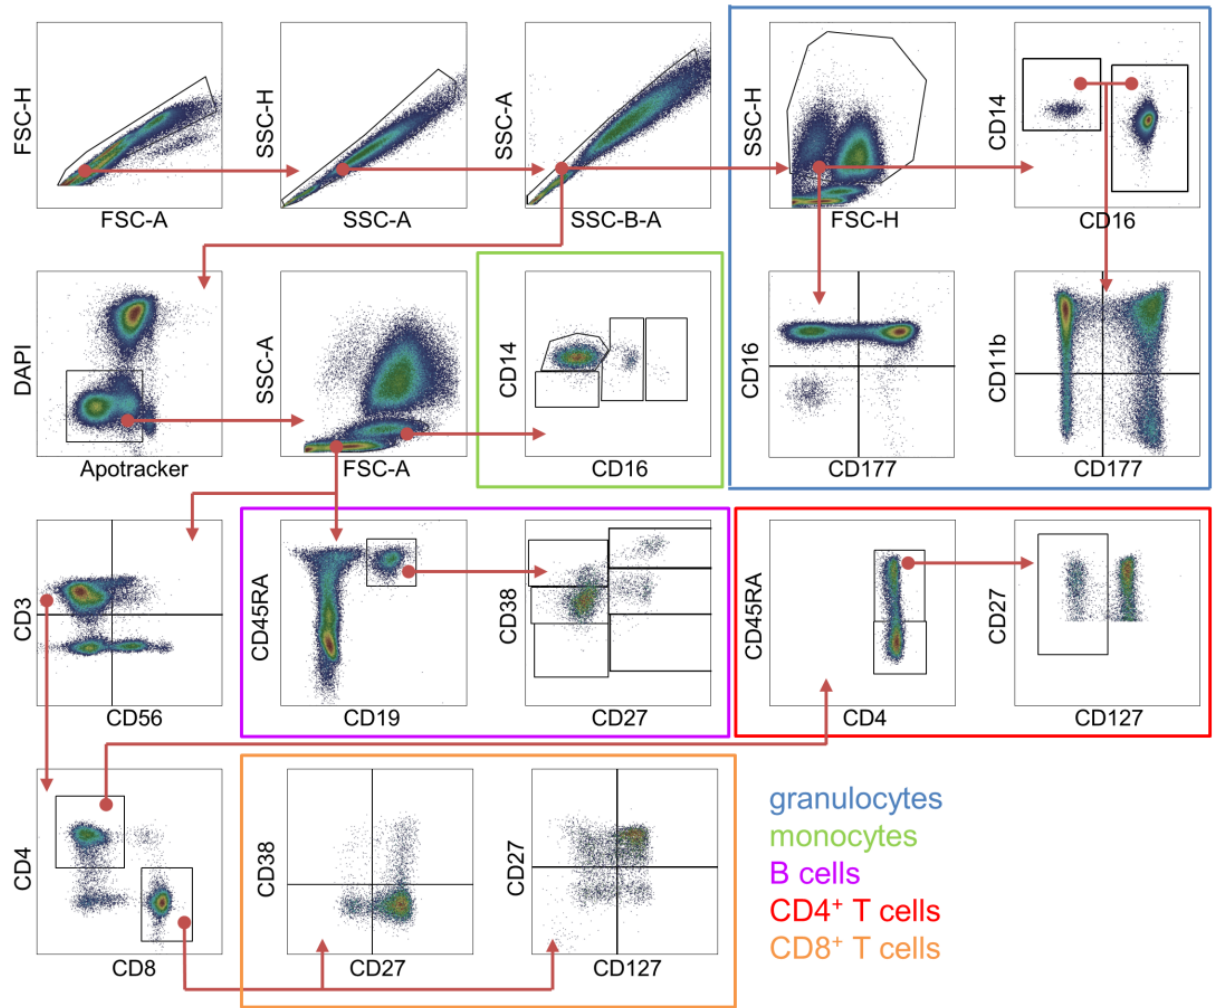

**Supplementary Fig. 6 Gating scheme for the 24-colour immune-phenotyping of peripheral whole blood cells.** Arrows indicate the hierarchical gating steps.

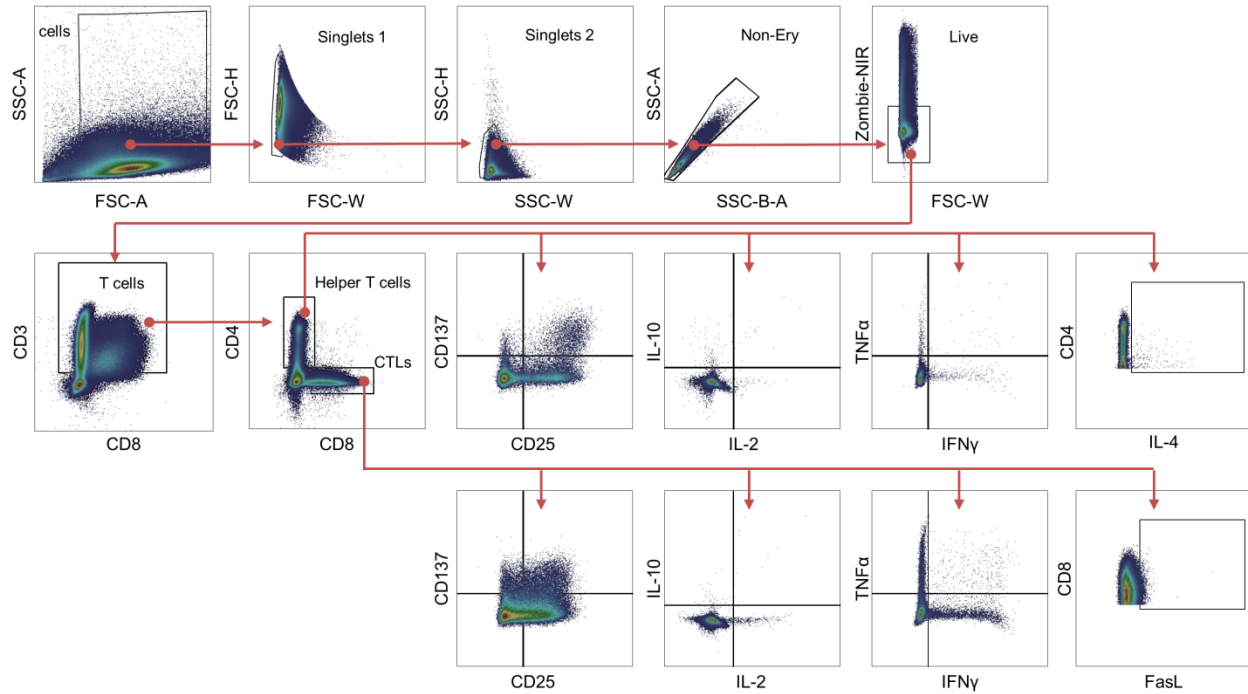

**Supplementary Fig. 7 Gating scheme for the intracellular cytokine staining assay, here exemplified for PMA/Ionomycin stimulated PBMC.** Expression of the activation markers CD25, CD137 as well as the cytokines IL-2, IL-10, IFN $\gamma$  and TNF $\alpha$  were analyzed on CD4<sup>+</sup> and CD8<sup>+</sup> cells, respectively. IL-4 production was analyzed only on CD4<sup>+</sup> cells while FasL expression was examined for CD8<sup>+</sup> cells only. Arrows indicate the hierarchical gating steps.



**Supplementary Table 1 Immune status during early AZD1222 vaccination response**

|              | Day 0 (n=18)            | Day 2 (n=15)             | Day 6 (n=17)             | Day 13 (n=16)            | Day 20 (n=16)            | p-value          |
|--------------|-------------------------|--------------------------|--------------------------|--------------------------|--------------------------|------------------|
|              | cells/ $\mu$ L [median] | cells / $\mu$ L [median] | cells / $\mu$ L [median] | cells / $\mu$ L [median] | cells / $\mu$ L [median] | (Kruskal-Wallis) |
|              | (IQR)                   | (IQR)                    | (IQR)                    | (IQR)                    | (IQR)                    |                  |
| granulocytes | 2394<br>(1842-3093)     | 632<br>(479-1101)        | 2004<br>(1618-2232)      | 2086<br>(1427-2862)      | 2107<br>(1355-2850)      | < 0.0001         |
| monocytes    | 369<br>(253-448)        | 269<br>(226-311)         | 278<br>(252-412)         | 252<br>(189-349)         | 297<br>(174-372)         | 0.3110           |
| lymphocytes  | 1846<br>(1788-2658)     | 1014<br>(698-1262)       | 1803<br>(1560-2689)      | 1925<br>(1585-2687)      | 1827<br>(1439-2338)      | 0.0009           |
| B cells      | 216<br>(140-287)        | 79<br>(57-160)           | 162<br>(126-261)         | 246<br>(187-409)         | 151<br>(122-278)         | 0.0019           |
| T cells      | 1102<br>(873-1524)      | 560<br>(416-695)         | 1114<br>(969-1419)       | 1178<br>(893-1416)       | 1005<br>(750-1230)       | 0.0004           |
| CD4+ T cells | 684<br>(521-1092)       | 333<br>(262-466)         | 734<br>(596-936)         | 799<br>(584-954)         | 637<br>(494-822)         | 0.0026           |
| CD8+ T cells | 325<br>(248-358)        | 149<br>(89-185)          | 299<br>(252-337)         | 291<br>(214-351)         | 252<br>(209-313)         | < 0.0001         |

**Supplementary Table 2 Immune status during early BNT162b2 vaccination response**

|              | Day 0 (n=18)            | Day 2 (n=17)             | Day 6 (n=18)             | Day 13 (n=16)            | Day 20 (n=17)            | p-value                        |
|--------------|-------------------------|--------------------------|--------------------------|--------------------------|--------------------------|--------------------------------|
|              | cells/ $\mu$ L [median] | cells / $\mu$ L [median] | cells / $\mu$ L [median] | cells / $\mu$ L [median] | cells / $\mu$ L [median] | (Kruskal-Wallis <sup>#</sup> ) |
|              | (IQR)                   | (IQR)                    | (IQR)                    | (IQR)                    | (IQR)                    | (one-way ANOVA*)               |
| granulocytes | 1330<br>(1132-2100)     | 1240<br>(1043-1683)      | 1571<br>(1239-2246)      | 1173<br>(831-1836)       | 1646<br>(1098-2221)      | 0.3834 <sup>#</sup>            |
| monocytes    | 345<br>(215-420)        | 329<br>(251-391)         | 303<br>(253-371)         | 331<br>(257-389)         | 307<br>(216-407)         | 0.9404*                        |
| lymphocytes  | 1829<br>(1332-2076)     | 1816<br>(1335-2023)      | 1756<br>(1603-2097)      | 1746<br>(1441-2674)      | 1704<br>(1492-2401)      | 0.7708*                        |
| B cells      | 158<br>(125-260)        | 147<br>(132-210)         | 233<br>(136-388)         | 178<br>(120-292)         | 229<br>(125-307)         | 0.0885*                        |
| T cells      | 945<br>(726-1194)       | 799<br>(705-1104)        | 946<br>(641-1053)        | 986<br>(648-1219)        | 1046<br>(761-1409)       | 0.4438 <sup>#</sup>            |
| CD4+ T cells | 558<br>(490-617)        | 511<br>(409-578)         | 543<br>(370-606)         | 589<br>(386-754)         | 623<br>(513-849)         | 0.3272 <sup>#</sup>            |
| CD8+ T cells | 249<br>(183-381)        | 236<br>(167-345)         | 241<br>(197-361)         | 256<br>(196-424)         | 302<br>(230-457)         | 0.6468 <sup>#</sup>            |

**Supplementary Table 3 Responders to vaccines**

| vaccine                       | IgM [% responders] |          | IgG [% responders] |          | IgA [% responders] |          |
|-------------------------------|--------------------|----------|--------------------|----------|--------------------|----------|
|                               | AZD1222            | BNT162b2 | AZD1222            | BNT162b2 | AZD1222            | BNT162b2 |
| day 0                         | 0                  | 0        | 5.3                | 0        | 0                  | 0        |
| day 2                         | 0                  | 0        | 0                  | 0        | 0                  | 0        |
| day 6                         | 0                  | 0        | 11.1               | 0        | 0                  | 5.6      |
| day 13                        | 52.9               | 26.7     | 47.1               | 86.7     | 11.8               | 100      |
| day 20                        | 52.9               | 47.1     | 82.4               | 100      | 23.5               | 100      |
| Fisher's exact test [p value] |                    | 0.033    |                    | 0.55     |                    | 0.040    |
